# Supplementary material for: High-conductivity graphene/carbon black inks via interpenetrating networks for wearable fabric-based heaters and strain sensors
Source: Royal Society of Chemistry journal article supplement (doi:10.1039/d4tc01100g), 2024-01-01
Supplement: d4tc01100g1.pdf [file d4tc01100g1.pdf]

## **High-conductivity Graphene/Carbon Black Inks by Interpenetrating Networks for Wearable Fabric-based Heaters and Strain Sensors**

Yujin Zhang <sup>a</sup>, Xiangping Chen <sup>b</sup>, Yuqi Dong <sup>a</sup>, Guowen Zhang <sup>a</sup>, Huizhuo Cai <sup>a</sup>,  
Yongcai Wu <sup>a</sup>, Yongxiao Bai <sup>a,\*</sup>

<sup>a</sup> Institute of Soft-Matter and Advanced Functional Materials, Carbon New Materials  
Industry Technology Center of Gansu Province, Key Laboratory of Special Function  
Materials and Structure Design of Ministry of Education, Lanzhou University, Lanzhou  
730000, China.

<sup>b</sup> Northwest Institute for Non-Ferrous Metal Research, Xian, 710016, China.

1

---

<sup>1</sup> \*Corresponding Authors E-mail: baiyx@lzu.edu.cn. Phone: +86 931 8915855, Fax: +86931 8915855.

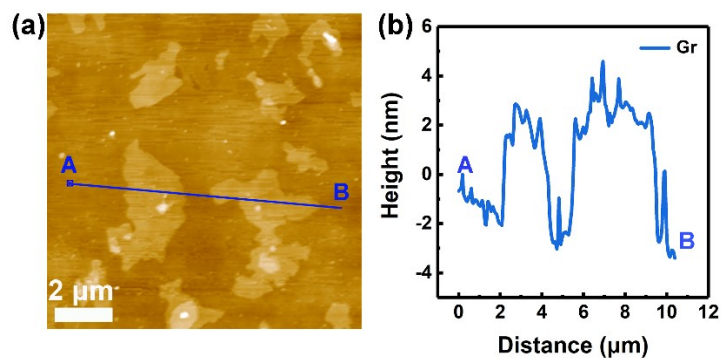

**Fig. S1** (a) AFM image and (b) height profiles of Gr on a mica sheet.

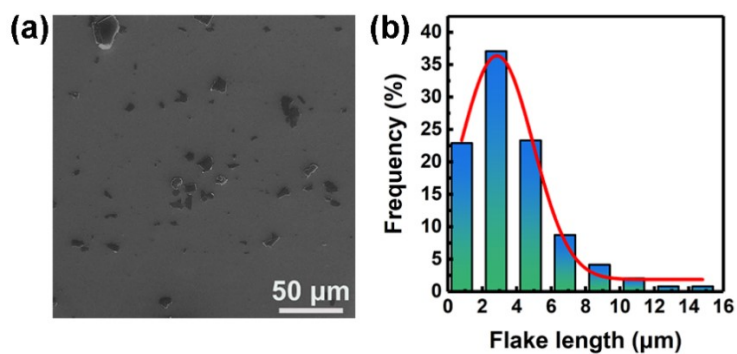

**Fig. S2** (a) SEM image of Exfoliated Gr/CB dispersion, (b) histograms of lateral flake size.

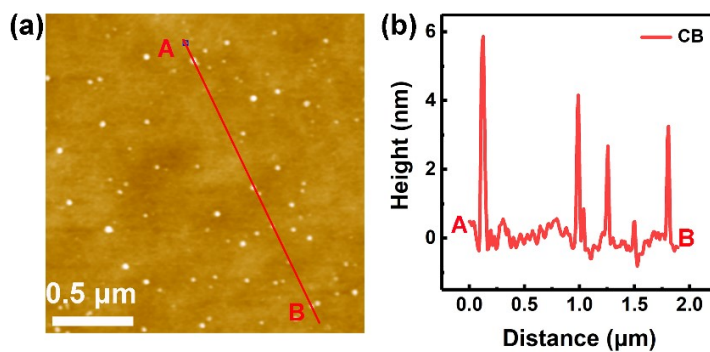

**Fig. S3** (a) AFM image and (b) height profiles of CB on a mica sheet.

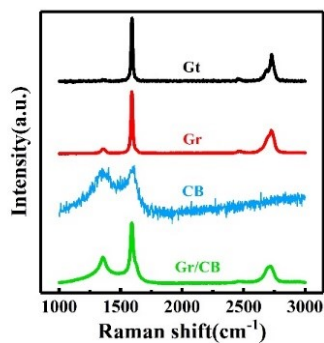

**Fig. S4** Raman spectra for Gt, Gr, CB, and Gr/CB dispersion.

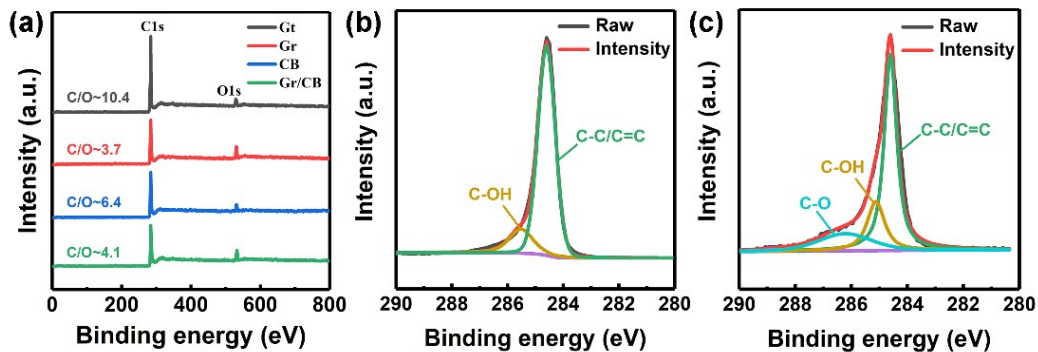

**Fig. S5** (a) XPS survey spectra of Gt, Gr, CB, and Gr/CB. High-resolution C<sub>1s</sub> of (b) the Gt and (c) the exfoliated Gr/CB dispersion.

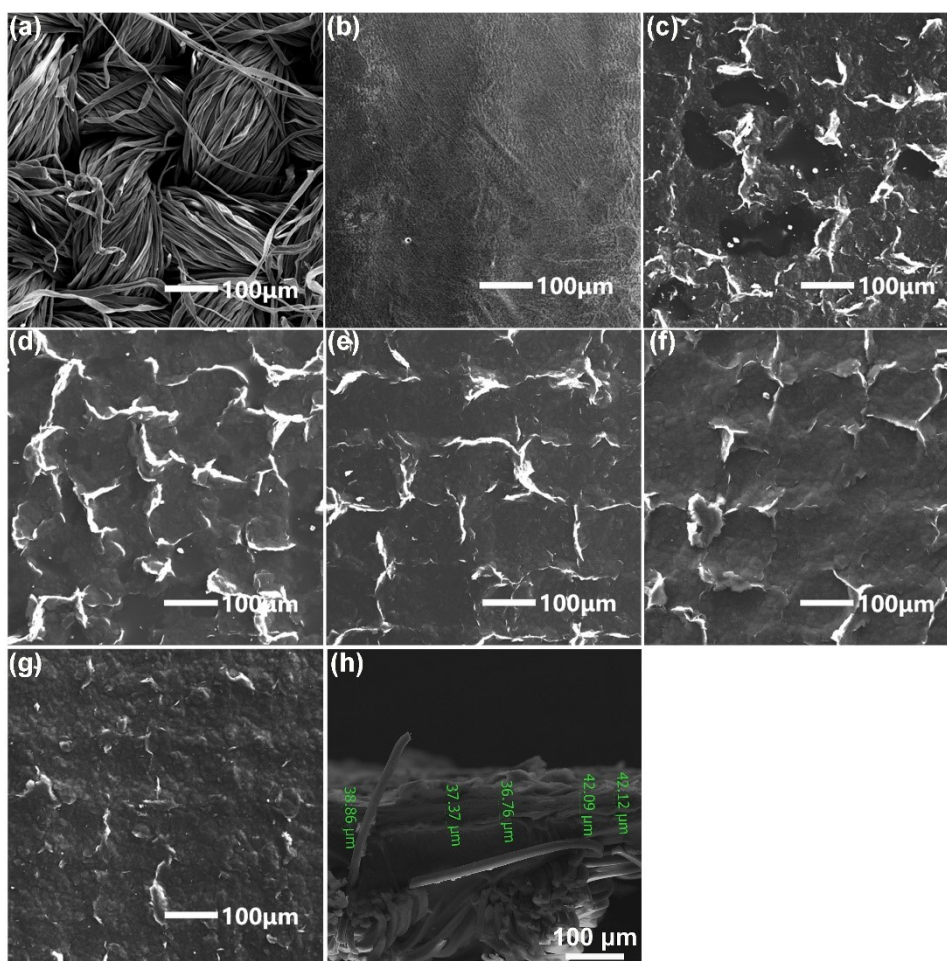

**Fig. S6** SEM images of (a) pristine fabric, (b) TPU-Fabric. SEM image of the number of different screen-printing cycles of Gr/CB@TPU-Fabric (c) 1 cycle, (d) 2 cycles, (e) 3 cycles, (f) 4 cycles, (g) 5 cycles. (h) SEM cross-section images of Gr/CB@TPU-Fabric for printing 4 cycles.

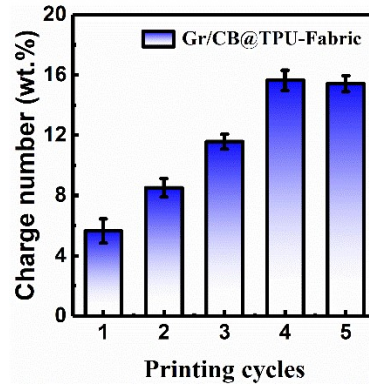

**Fig. S7** Relationship between the number of screen-printing cycles and charge number of Gr/CB@TPU-Fabric.

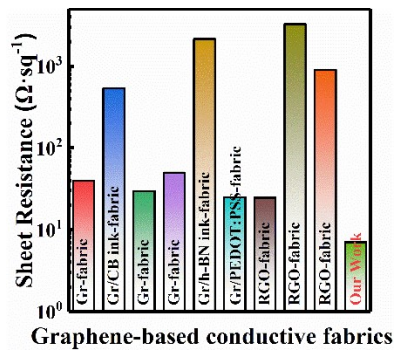

**Fig. S8** Comparison of the electrical properties of the Gr/CB@TPU-Fabric and previously reported graphene-based conductive fabrics.

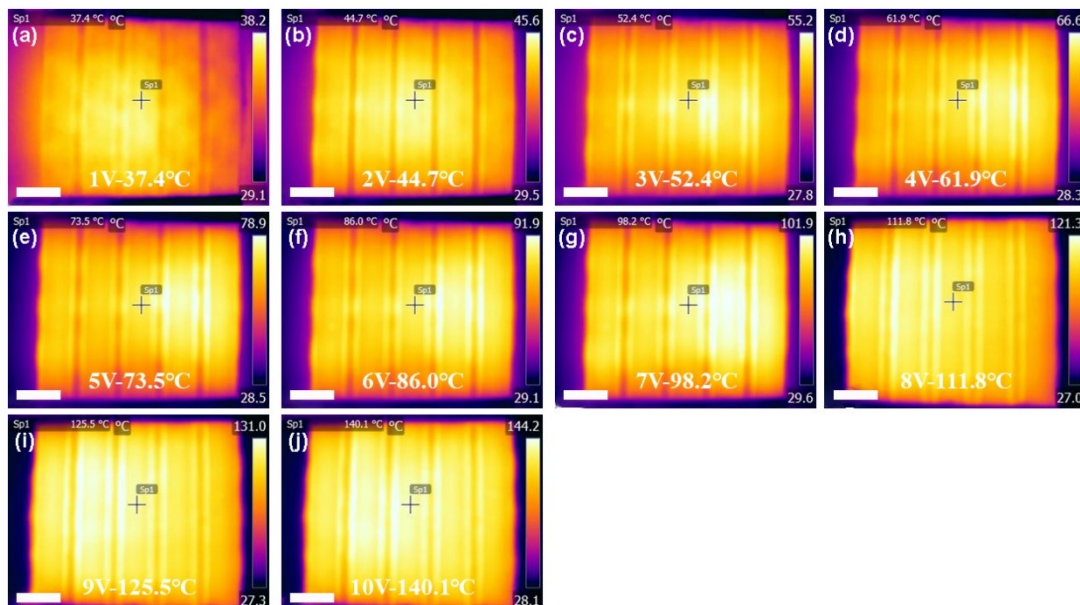

**Fig. S9** The IR thermal photographs of the Gr/CB@TPU-Fabric (Scale bar: 2 cm).

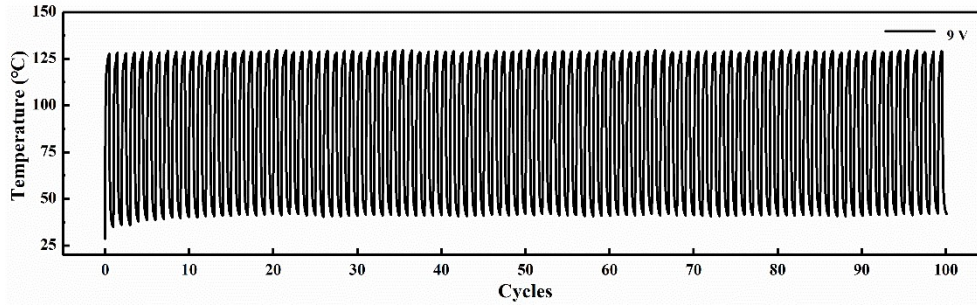

**Fig. S10** Heating-cooling cycles stability of graphene conductive fabric under 9 V.

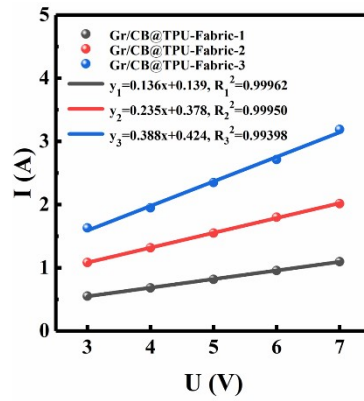

**Fig. S11** The relationship between various parameters of Gr/CB@TPU-Fabric with different areas for Voltage and current.

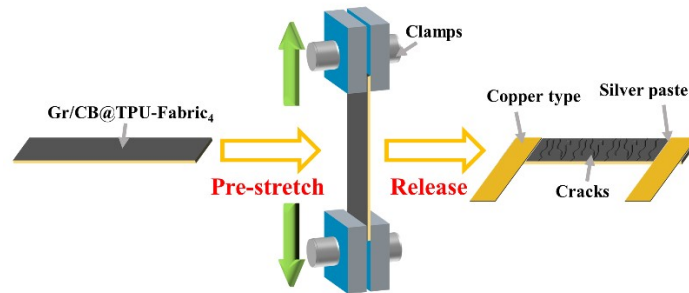

**Fig. S12** Schematic diagram of preparation process of Gr/CB@TPU-Fabric-based strain sensor.

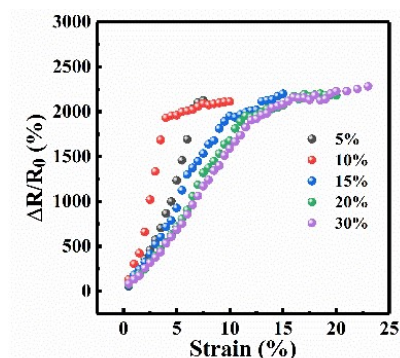

**Fig. S13** The relationship between the relative resistance changes and Gr/CB@TPU-Fabric-based strain sensor strain with different pre-stretching strains.

**Table S1.** Summary of some wearable fabric-based heaters and their performances.

| Heating Materials | Heating Area (cm <sup>2</sup> ) | Voltage Range (V) | Temperature at low voltage (°C) | Ref.     |
|-------------------|---------------------------------|-------------------|---------------------------------|----------|
| Ag NPs/MXene      | <5×5                            | 10-17.5           | 37.7 (10 V)                     | 32       |
| rGO/CNT/Cu        | 2×2                             | 2-5               | 51.0 (4 V)                      | 33       |
| Gr/CNT/PEDOT:PS   | 3×2                             | 10-30             | 42.3 (10 V)                     | 34       |
| S                 |                                 |                   |                                 |          |
| MXene/Ppy         | 3×3                             | 4-10              | 40.1 (4 V)                      | 35       |
| PEDOT             | 4×4                             | 2-10              | 24.1 (2 V)                      | 36       |
| PEDOT:PSS         | 1×1                             | 3-6               | 27.0 (3 V)                      | 37       |
| PEDOT:PSS/rGO     | 3×1                             | 5-30              | 31.5 (5 V)                      | 38       |
| rGO/Ppy           | 2×2                             | 3-9               | 42.4 (3 V)                      | 39       |
| Gr/CB ink         | 8.5×16                          | 3-7               | 53.4 (3 V)                      | Our work |

**Table S2.** Summary of performance of flexible fabric-based strain sensors.

| Materials      | Methods                            | Strain range (%) | GF                                                  | Response Time (ms) | Ref.      |
|----------------|------------------------------------|------------------|-----------------------------------------------------|--------------------|-----------|
| Graphene       | CVD                                | <10              | 34.3-48.9 (8%)                                      | -                  | 40        |
| RGO            | Dipping                            | 0.05-75          | ~8.9 (<5%)                                          | -                  | 41        |
| Gr/PVDF/PU     | Phase-separation                   | 0.01-10          | 51 (0-5%)<br>87 (5-8%)                              | <100               | 42        |
| RGO            | Wet-spinning/<br>Vacuum filtration | 0.24-70          | 1200 (20%)                                          | ~30                | 43        |
| RGO/TPU        | Electrospinning                    | 0-150            | ~50 (50%)                                           | <160               | 44        |
| GNPs/CB        | Dip-coating                        | 0-60             | 5.62 (4%)                                           | <209               | 45        |
| GNPs/CB ink    | Dip-coating                        | 0-200            | 5 (0-127%)<br>7.75 (127-200%)                       | ~172               | 46        |
| RGO            | Dip-coating                        | 0-100            | 10 (<1%)<br>3.7 (<50%)                              | <100               | 47        |
| GNPs           | LbL                                | 0-150            | 1.4                                                 | -                  | 48        |
| GO             | Screen-printing                    | -                | -                                                   | -                  | 49        |
| Graphene       | Coating                            | 0-80             | 6.04 (0-21%)<br>1.97 (26-80%)                       | -                  | 50        |
| RGO ink        | Spraying                           | 0-23             | 60 (<10%)<br>1747 (~15-20%)                         | 80                 | 51        |
| MXene/<br>PANI | Dip-coating                        | 0.5-100          | ~16.66<br>24 (0-5%)                                 | 90                 | 52        |
| PANI/RGO       | Dipping                            | 0-50             | 6 (5-20%)<br>1.27 (20-50%)                          | 85                 | 53        |
| RGO            | Dip and reduce                     | 0-150            | 1.5 (0-10%)<br>6 (10-150%)                          | 40                 | 54        |
| Gr/CB ink      | Screen-printing                    | 0-10             | 307.79 (0-1.8%)<br>628.61 (1.8-4%)<br>30.83 (4-10%) | 87.4               | This work |
